# Supplementary material for: Geomorphological and geomorphometrical characterization of subglacial channels on Devon Island, Nunavut, Canada
Source: Copernicus journal article supplement (doi:10.5194/egusphere-2024-164), 2024-01-29

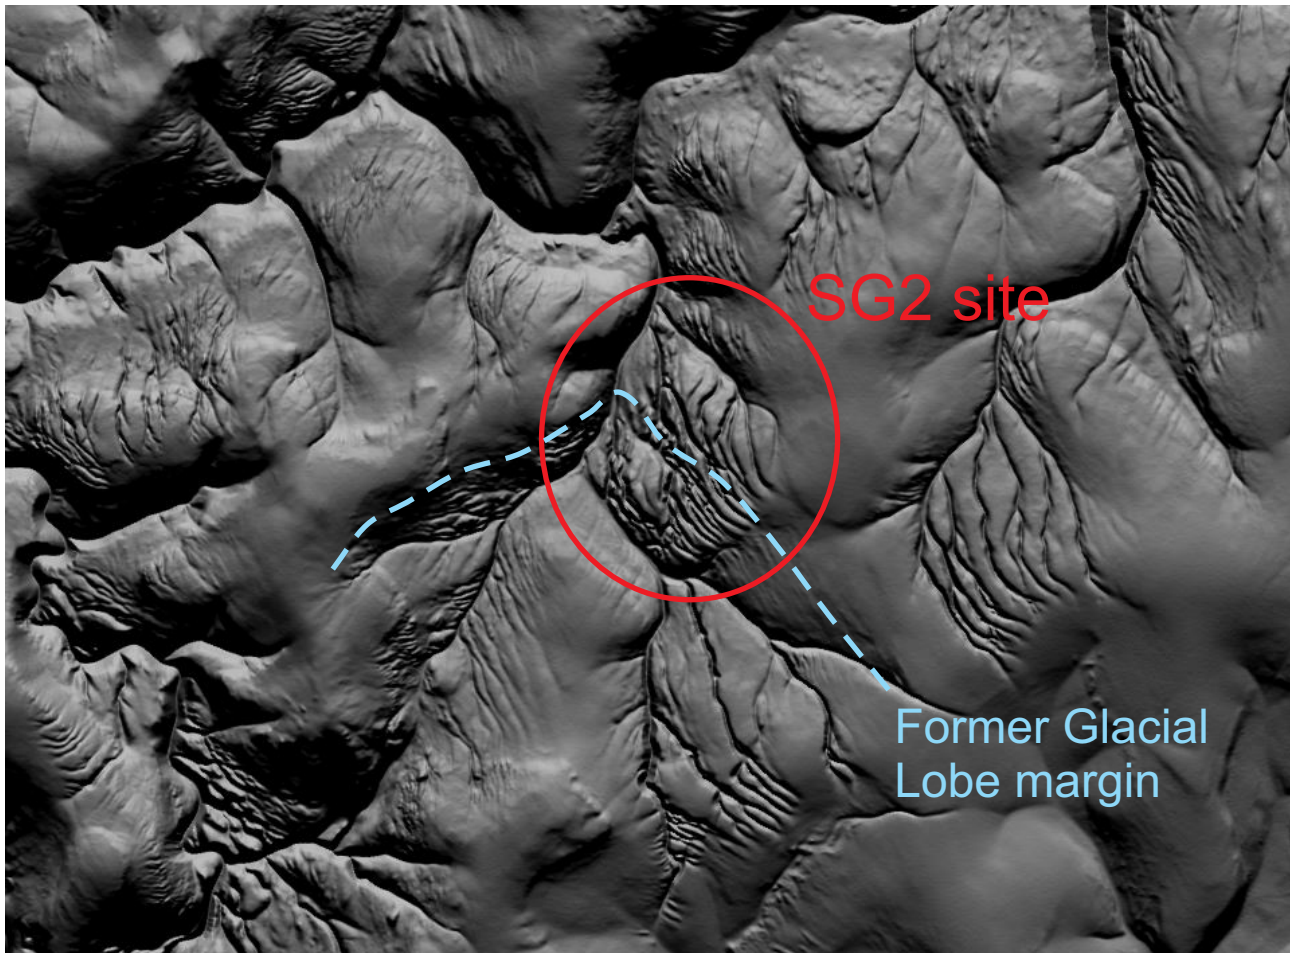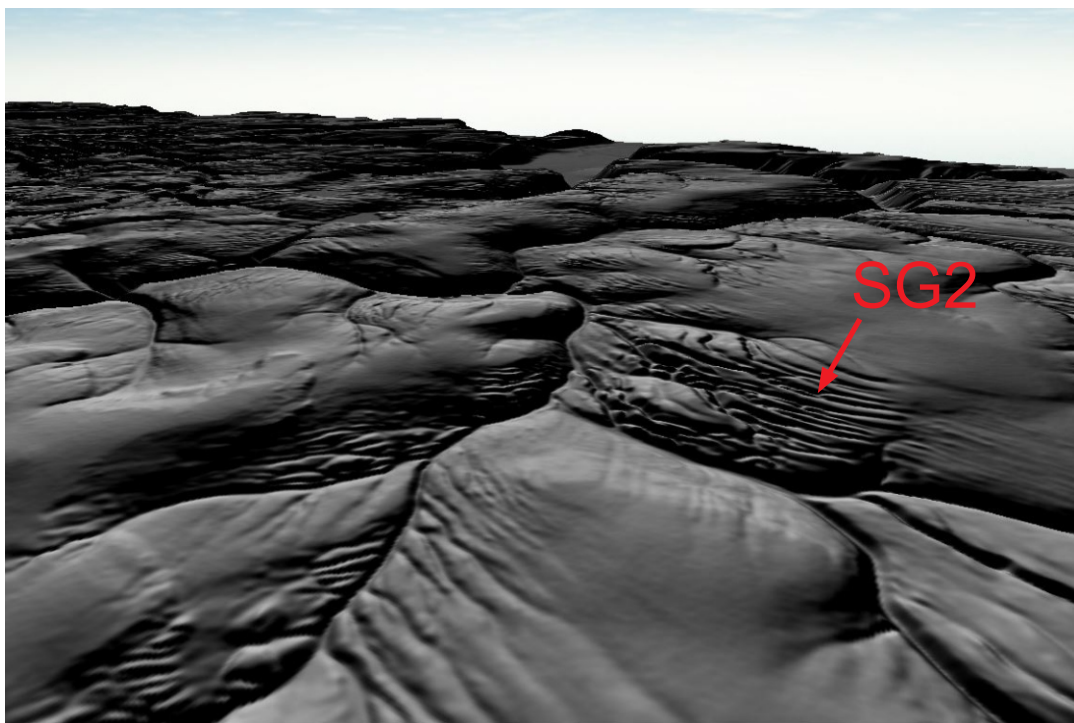

From Pos: 439309.847, 8357871.727

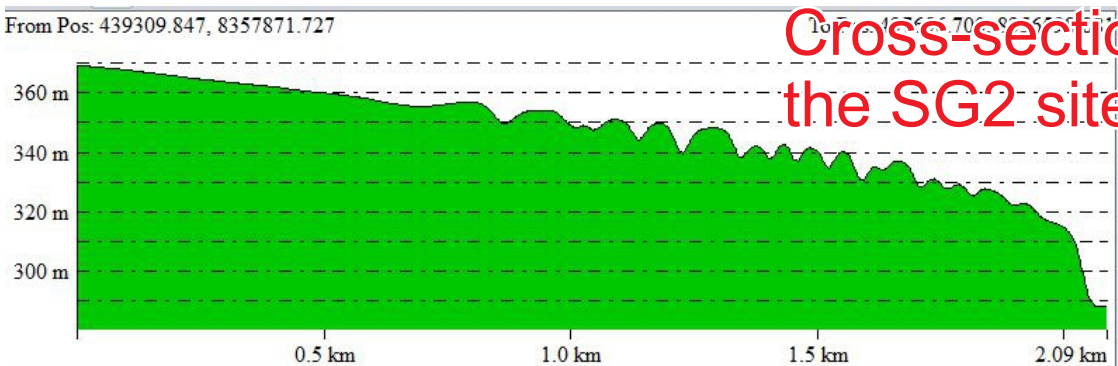

Supplement: Supplementary file [file egusphere-2024-164-RC2-supplement.pdf]
